# Supplementary material
Source: Springer Nature journal article supplement (https://www.springermedizin.de/resource/supplementary/12963_2005_44_MOESM20_ESM.pdf/9572516)

## Female Ranking

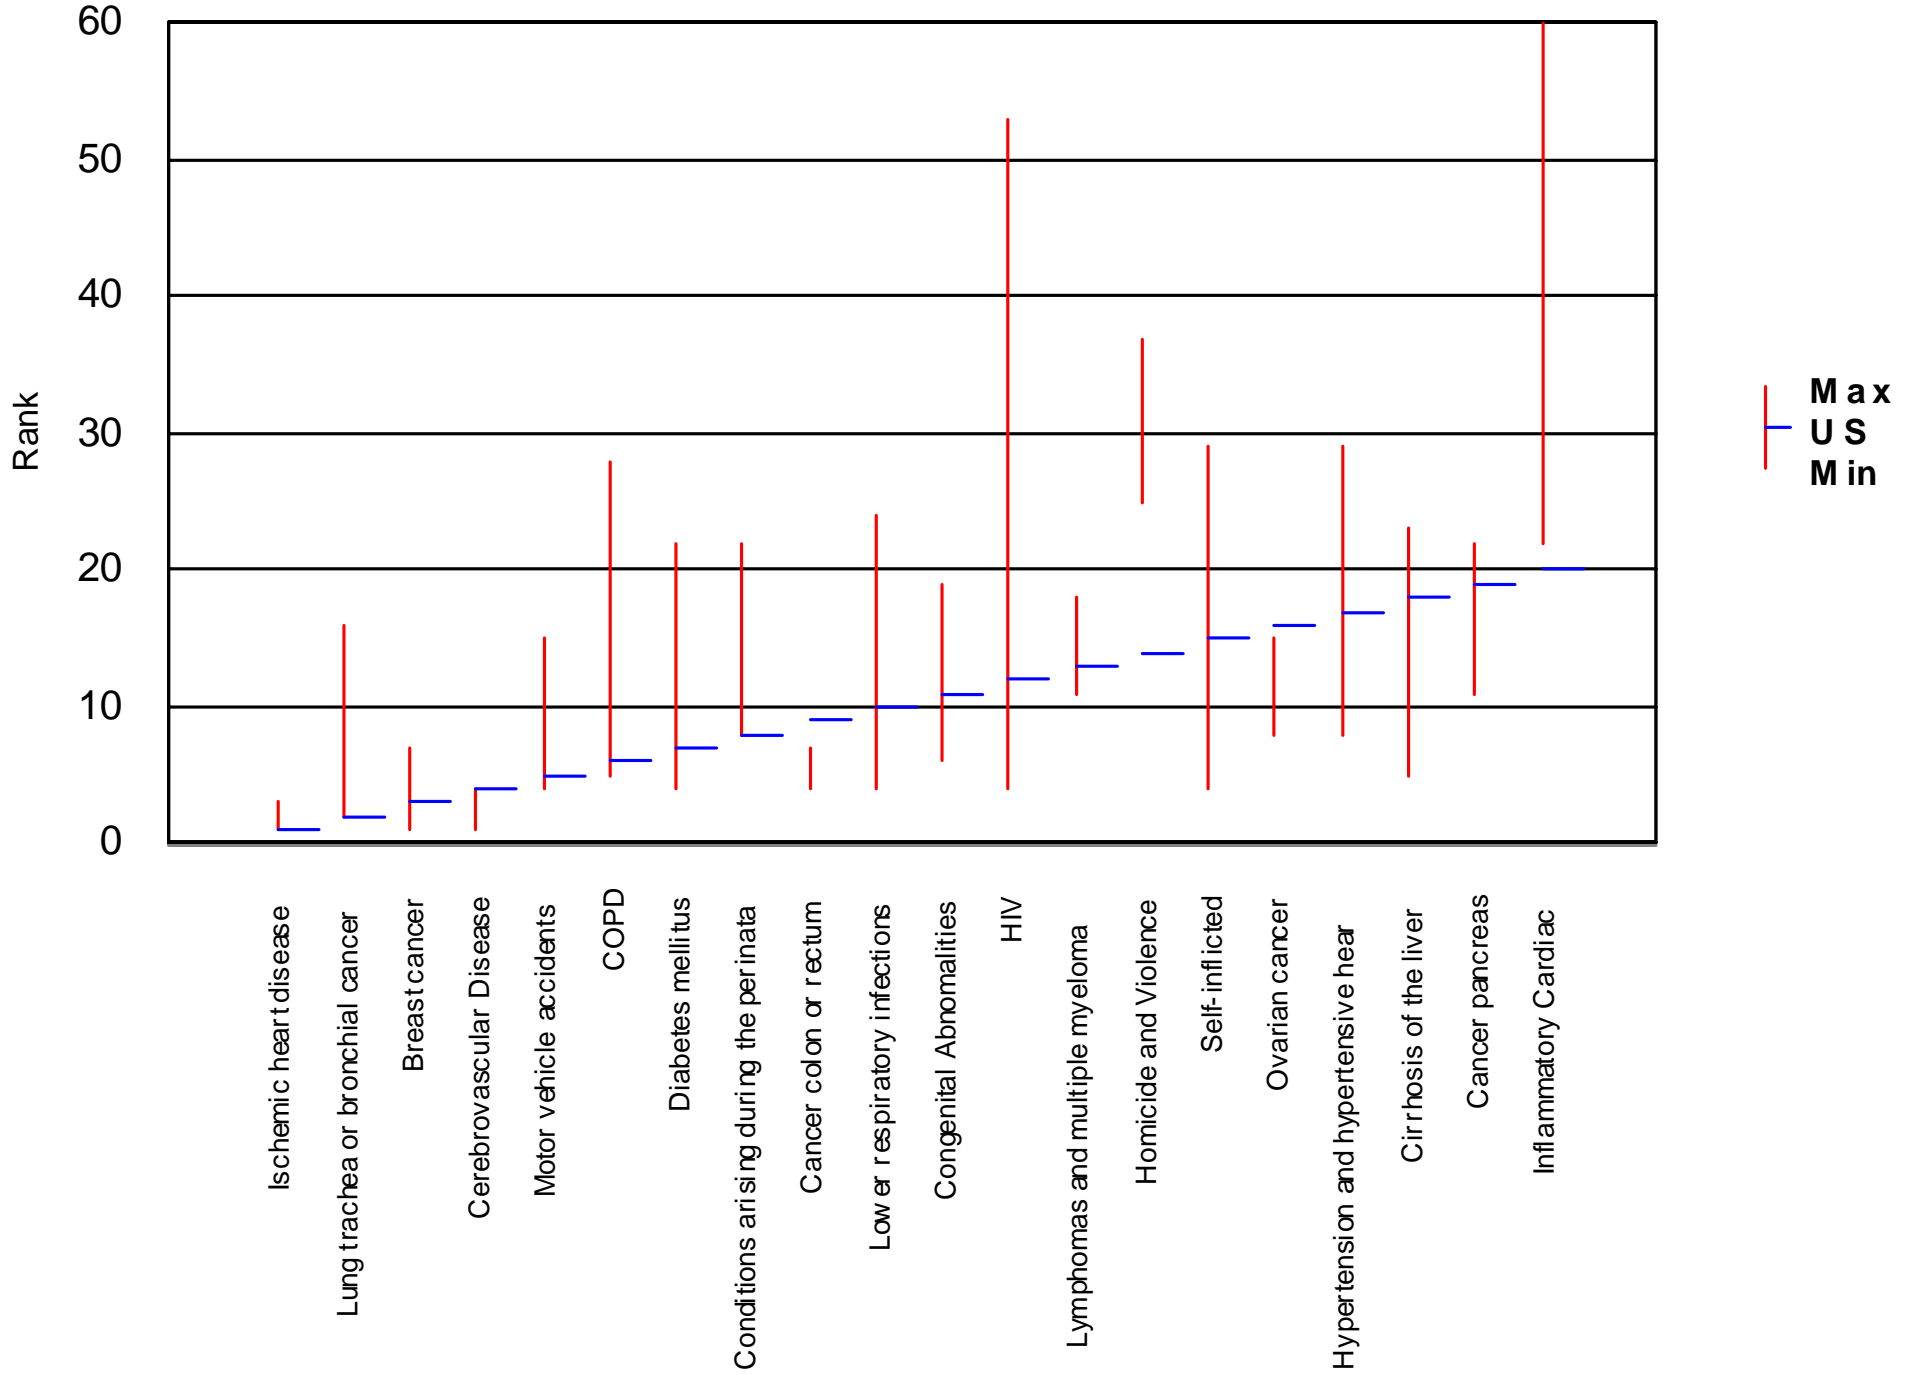

Supplement: MOESM20 [file 9572516]
